# Supplementary material for: PAGE: Parametric Analysis of Gene Set Enrichment
Source: PubMed Central journal article supplement (PMC1183189; doi:10.1186/1471-2105-6-144), 2005-06-08
Supplement: 1471-2105-6-144-S1.pdf [file 1471-2105-6-144-S1.pdf]

Table A1. Comparison of GDS 472 by PAGE and GSEA: Ranking by GSEA

| Gene Set                               | PAGE<br>Z score | p-value  | GSEA<br>ES | NES     | p-value |
|----------------------------------------|-----------------|----------|------------|---------|---------|
| muscle_myosin                          | -4.0327         | 5.51E-05 | -0.6703    | -1.5934 | 0.0000  |
| cell_cycle_arrest                      | -2.4142         | 0.0158   | -0.4117    | -1.3109 | 0.0625  |
| radiation_sensitivity                  | -1.8167         | 0.0693   | -0.4217    | -1.2465 | 0.0755  |
| P53_UP                                 | -4.0146         | 5.95E-05 | -0.5139    | -1.3192 | 0.0816  |
| p53_signalling                         | -2.8896         | 0.0039   | -0.3306    | -1.2340 | 0.0816  |
| etsPathway                             | -2.8058         | 0.0050   | -0.5217    | -1.3080 | 0.1053  |
| raccycdPathway                         | -1.3869         | 0.1655   | -0.3583    | -1.2005 | 0.1132  |
| carm-erPathway                         | -2.1483         | 0.0317   | -0.3821    | -1.2382 | 0.1333  |
| atmPathway                             | -2.4814         | 0.0131   | -0.4639    | -1.2033 | 0.1471  |
| P53_DOWN                               | -1.0935         | 0.2742   | -0.3831    | -1.1541 | 0.1667  |
| CR_IMMUNE_FUNCTION                     | -0.3974         | 0.6911   | -0.3268    | -1.1452 | 0.1837  |
| mRNA_splicing                          | -2.2718         | 0.0231   | -0.3329    | -1.1813 | 0.2000  |
| HOXA9_UP                               | -2.3688         | 0.0178   | -0.3876    | -1.2367 | 0.2154  |
| CR_TRANSCRIPTION_FACTORS               | -1.7588         | 0.0786   | -0.3249    | -1.1084 | 0.2162  |
| tumor_supressor                        | -1.9976         | 0.0458   | -0.3624    | -1.1211 | 0.2292  |
| MAP00531_Glycosaminoglycan_degradation | -1.3951         | 0.1630   | -0.4409    | -1.2251 | 0.2321  |
| DNA_DAMAGE_SIGNALLING                  | -2.8829         | 0.0039   | -0.3396    | -1.1629 | 0.2364  |
| tnfr1Pathway                           | -2.3683         | 0.0179   | -0.4316    | -1.2133 | 0.2407  |
| g2Pathway                              | -1.7803         | 0.0750   | -0.4261    | -1.1835 | 0.2500  |
| nkcellsPathway                         | -0.9083         | 0.3637   | -0.4169    | -1.0992 | 0.2667  |
| tnf_and_fas_network                    | -1.0109         | 0.3121   | -0.3823    | -1.0924 | 0.2754  |
| caspasePathway                         | -2.1302         | 0.0332   | -0.4702    | -1.1471 | 0.2979  |
| gsk3Pathway                            | -0.9618         | 0.3362   | -0.3298    | -1.0634 | 0.3051  |
| p53Pathway                             | -1.5284         | 0.1264   | -0.3861    | -1.0904 | 0.3103  |
| mRNA_processing                        | -3.5606         | 0.0004   | -0.3729    | -1.1319 | 0.3134  |
| MAP00500_Starch_and_sucrose_metabolism | 0.5361          | 0.5919   | -0.3408    | -1.1099 | 0.3333  |
| mitochondriaPathway                    | -0.7847         | 0.4327   | -0.4164    | -1.0881 | 0.3469  |
| keratinocytePathway                    | -1.2659         | 0.2056   | -0.3327    | -1.0540 | 0.3607  |
| d4gdiPathway                           | -2.2048         | 0.0275   | -0.4968    | -1.1358 | 0.3617  |
| p53hypoxiaPathway                      | -0.8010         | 0.4231   | -0.3406    | -1.0347 | 0.3654  |
