# Supplementary material for: PAGE: Parametric Analysis of Gene Set Enrichment
Source: PubMed Central journal article supplement (PMC1183189; doi:10.1186/1471-2105-6-144), 2005-06-08
Supplement: 1471-2105-6-144-S2.pdf [file 1471-2105-6-144-S2.pdf]

Table A2. Comparison of GDS 287 by PAGE and GSEA: Ranking by GSEA

| Gene Set               | PAGE<br>Z score | p-value  | GSEA<br>ES | NES     | p-value |
|------------------------|-----------------|----------|------------|---------|---------|
| p53hypoxiaPathway      | -4.5002         | 6.79E-06 | -0.4718    | -1.6393 | 0.0000  |
| DNA_DAMAGE_SIGNALLING  | -3.0801         | 0.0021   | -0.2717    | -1.3045 | 0.0000  |
| cell2cellPathway       | -2.7031         | 0.0069   | -0.5589    | -1.6968 | 0.0156  |
| HOXA9_DOWN             | -4.3054         | 1.67E-05 | -0.4235    | -1.6004 | 0.0161  |
| nkcellsPathway         | -3.0887         | 0.0020   | -0.4700    | -1.5672 | 0.0179  |
| p53Pathway             | -3.0569         | 0.0022   | -0.4149    | -1.4027 | 0.0238  |
| cell_cycle_arrest      | -2.7869         | 0.0053   | -0.3798    | -1.4769 | 0.0267  |
| mRNA_processing        | -4.9809         | 6.33E-07 | -0.4546    | -1.5564 | 0.0303  |
| INSULIN_2F_UP          | -6.4688         | 9.88E-11 | -0.3410    | -1.4772 | 0.0308  |
| atmPathway             | -4.1716         | 3.03E-05 | -0.4543    | -1.5335 | 0.0308  |
| cell_cycle_checkpoint  | -2.3224         | 0.0202   | -0.3807    | -1.5321 | 0.0328  |
| mRNA_splicing          | -3.9571         | 7.59E-05 | -0.4001    | -1.4710 | 0.0400  |
| LEU_UP                 | -3.5795         | 0.0003   | -0.2493    | -1.2396 | 0.0577  |
| eponfkbPathway         | -3.6026         | 0.0003   | -0.4227    | -1.3801 | 0.0600  |
| p53_signalling         | -2.8926         | 0.0038   | -0.2651    | -1.2563 | 0.0682  |
| HOXA9_UP               | -3.3693         | 0.0008   | -0.3992    | -1.4511 | 0.0685  |
| XINACT                 | -1.6032         | 0.1089   | -0.3595    | -1.3885 | 0.0784  |
| Proteasome_Degradation | -3.5819         | 0.0003   | -0.4008    | -1.5300 | 0.0806  |
| CR_CYTOSKELETON        | -3.3495         | 0.0008   | -0.4317    | -1.3630 | 0.0822  |
| tidPathway             | -2.3461         | 0.0190   | -0.3696    | -1.3025 | 0.0862  |
| muscle_myosin          | -5.1167         | 3.11E-07 | -0.4315    | -1.3197 | 0.0984  |
| ucalpainPathway        | -1.6543         | 0.0981   | -0.3498    | -1.2444 | 0.1020  |
| g2Pathway              | -2.6938         | 0.0071   | -0.3765    | -1.2905 | 0.1061  |
| carm-erPathway         | -1.4253         | 0.1541   | -0.3143    | -1.2644 | 0.1081  |
| hivnefPathway          | -3.4484         | 0.0006   | -0.2954    | -1.2734 | 0.1094  |
| shhPathway             | -1.5605         | 0.1187   | -0.3976    | -1.2872 | 0.1207  |
| proteasomePathway      | -2.0807         | 0.0375   | -0.4161    | -1.4494 | 0.1250  |
| pdgfPathway            | -3.3477         | 0.0008   | -0.3999    | -1.3494 | 0.1333  |
| telPathway             | -2.9998         | 0.0027   | -0.3769    | -1.3092 | 0.1333  |
| ccr5Pathway            | -3.2935         | 0.0010   | -0.3228    | -1.2279 | 0.1455  |
