# Supplementary material for: PAGE: Parametric Analysis of Gene Set Enrichment
Source: PubMed Central journal article supplement (PMC1183189; doi:10.1186/1471-2105-6-144), 2005-06-08
Supplement: 1471-2105-6-144-S3.pdf [file 1471-2105-6-144-S3.pdf]

Table A3. Comparison of GDS 963n1 by PAGE and GSEA: Ranking by GSEA

| Gene Set                                           | PAGE<br>Z score | p-value | ES     | GSEA<br>NES | p-value |
|----------------------------------------------------|-----------------|---------|--------|-------------|---------|
| MAP00280_Valine_leucine_and_isoleucine_degradation | 3.6010          | 0.0003  | 0.5468 | 1.7513      | 0.0222  |
| MAP00120_Bile_acid_biosynthesis                    | 2.3297          | 0.0198  | 0.5674 | 1.7058      | <0.01   |
| GLUCOSE_UP                                         | 4.0669          | 0.0000  | 0.4416 | 1.6302      | <0.01   |
| LEU_UP                                             | 3.6744          | 0.0002  | 0.3609 | 1.6154      | <0.01   |
| Inflammatory_Response_Pathway                      | 3.0751          | 0.0021  | 0.5419 | 1.6142      | 0.0508  |
| cell_adhesion                                      | 6.5012          | 0.0000  | 0.3979 | 1.5749      | <0.01   |
| MAP00260_Glycine_serine_and_threonine_metabolism   | 2.7381          | 0.0062  | 0.4660 | 1.4970      | 0.0192  |
| MAP00252_Alanine_and_aspartate_metabolism          | 2.7539          | 0.0059  | 0.4577 | 1.4779      | 0.1053  |
| CR_CYTOSKELETON                                    | 2.9006          | 0.0037  | 0.4408 | 1.4613      | 0.0345  |
| pgc1aPathway                                       | 0.8129          | 0.4163  | 0.3701 | 1.4527      | <0.01   |
| calcineurinPathway                                 | 0.9167          | 0.3593  | 0.4042 | 1.4473      | 0.0227  |
| ST_Wnt_Ca2_cyclic_GMP_Pathway                      | 2.2348          | 0.0254  | 0.4886 | 1.4350      | 0.0588  |
| CR_CAM                                             | 2.8259          | 0.0047  | 0.3468 | 1.4316      | 0.0192  |
| FA                                                 | 1.7671          | 0.0772  | 0.4533 | 1.4210      | 0.1667  |
| intrinsicPathway                                   | 1.7768          | 0.0756  | 0.4435 | 1.3683      | 0.1607  |
| integrinPathway                                    | 0.9518          | 0.3412  | 0.3744 | 1.3642      | 0.1600  |
| ccr5Pathway                                        | 1.3963          | 0.1626  | 0.3566 | 1.3542      | 0.1321  |
| MAP00350_Tyrosine_metabolism                       | 2.1392          | 0.0324  | 0.4092 | 1.3385      | 0.1207  |
| ndkDynaminPathway                                  | 0.7258          | 0.4679  | 0.3832 | 1.3280      | 0.1522  |
| ANTI_CD44_UP                                       | 1.1332          | 0.2572  | 0.3812 | 1.3158      | 0.0652  |
| MAP00640_Propanoate_metabolism                     | 1.5603          | 0.1187  | 0.4051 | 1.3122      | 0.1316  |
| il7Pathway                                         | 2.2041          | 0.0275  | 0.3862 | 1.3116      | 0.1667  |
| ecmPathway                                         | 1.3016          | 0.1931  | 0.3588 | 1.3102      | 0.0882  |
| mcalpainPathway                                    | 1.1795          | 0.2382  | 0.3936 | 1.2782      | 0.1887  |
| GLUT_UP                                            | 4.1735          | 0.0000  | 0.2481 | 1.2705      | 0.1250  |
| EMT_UP                                             | 2.9125          | 0.0036  | 0.3859 | 1.2493      | 0.2439  |
| rhoPathway                                         | 1.7229          | 0.0849  | 0.3292 | 1.2394      | 0.1961  |
| cell_adhesion_receptor_activity                    | 2.9385          | 0.0033  | 0.3510 | 1.2283      | 0.1731  |
| FRASOR_ER_DOWN                                     | 0.5235          | 0.6007  | 0.2940 | 1.1861      | 0.2500  |
| EMT_DOWN                                           | 1.8760          | 0.0607  | 0.3194 | 1.1780      | 0.2128  |
| mef2dPathway                                       | 0.1754          | 0.8607  | 0.3153 | 1.1521      | 0.2549  |
| HTERT_DOWN                                         | 0.9126          | 0.3615  | 0.2601 | 1.1169      | 0.2353  |
