# Supplementary material for: PAGE: Parametric Analysis of Gene Set Enrichment
Source: PubMed Central journal article supplement (PMC1183189; doi:10.1186/1471-2105-6-144), 2005-06-08
Supplement: 1471-2105-6-144-S4.pdf [file 1471-2105-6-144-S4.pdf]

Table A4. Comparison of GDS 963n1 by PAGE and GSEA: Ranking by PAGE

| Gene Set                                           | PAGE<br>Z score | p-value | ES     | GSEA<br>NES | p-value |
|----------------------------------------------------|-----------------|---------|--------|-------------|---------|
| cell_adhesion                                      | 6.5012          | 0.0000  | 0.3979 | 1.5749      | <0.01   |
| GLUT_UP                                            | 4.1735          | 0.0000  | 0.2481 | 1.2705      | 0.1250  |
| GLUCOSE_UP                                         | 4.0669          | 0.0000  | 0.4416 | 1.6302      | <0.01   |
| LEU_UP                                             | 3.6744          | 0.0002  | 0.3609 | 1.6154      | <0.01   |
| MAP00280_Valine_leucine_and_isoleucine_degradation | 3.6010          | 0.0003  | 0.5468 | 1.7513      | 0.0222  |
| cell_adhesion_molecule_activity                    | 3.5182          | 0.0004  | 0.2933 | 1.1291      | 0.3214  |
| Inflammatory_Response_Pathway                      | 3.0751          | 0.0021  | 0.5419 | 1.6142      | 0.0508  |
| cell_adhesion_receptor_activity                    | 2.9385          | 0.0033  | 0.3510 | 1.2283      | 0.1731  |
| EMT_UP                                             | 2.9125          | 0.0036  | 0.3859 | 1.2493      | 0.2439  |
| CR_CYTOSKELETON                                    | 2.9006          | 0.0037  | 0.4408 | 1.4613      | 0.0345  |
| CR_CAM                                             | 2.8259          | 0.0047  | 0.3468 | 1.4316      | 0.0192  |
| MAP00252_Alanine_and_aspartate_metabolism          | 2.7539          | 0.0059  | 0.4577 | 1.4779      | 0.1053  |
| MAP00260_Glycine_serine_and_threonine_metabolism   | 2.7381          | 0.0062  | 0.4660 | 1.4970      | 0.0192  |
| MAP00120_Bile_acid_biosynthesis                    | 2.3297          | 0.0198  | 0.5674 | 1.7058      | <0.01   |
| ST_Wnt_Ca2_cyclic_GMP_Pathway                      | 2.2348          | 0.0254  | 0.4886 | 1.4350      | 0.0588  |
| il7Pathway                                         | 2.2041          | 0.0275  | 0.3862 | 1.3116      | 0.1667  |
| MAP00350_Tyrosine_metabolism                       | 2.1392          | 0.0324  | 0.4092 | 1.3385      | 0.1207  |
